# Supplementary material for: Controlling the biointerface of electrospun mats for clot lysis: an engineered tissue plasminogen activator link to a lysine-functionalized surface
Source: Royal Society of Chemistry journal article supplement (doi:10.1039/c4tb00488d), 2014-01-01
Supplement: c4tb00488d1.pdf [file c4tb00488d1.pdf]

## Supporting Information

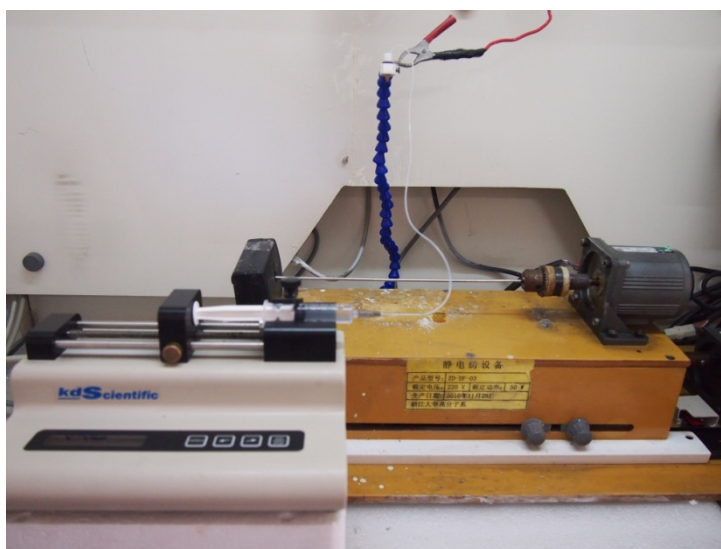

**Figure S1.** The picture of electrospinning instruments used in this study.

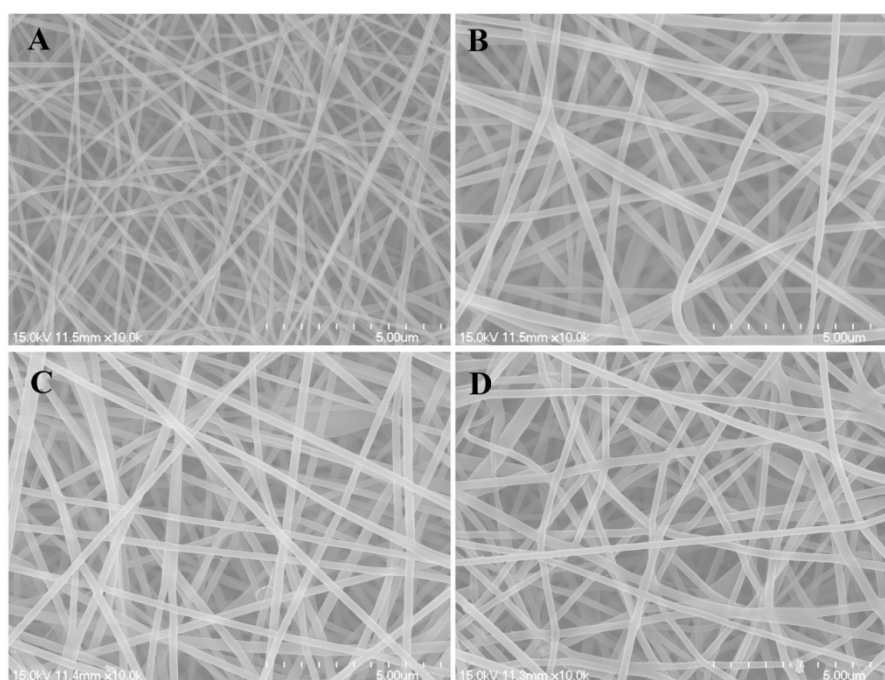

**Figure S2.** SEM images of nanofibers before cross-linking process: (A)PVA-0, (B)PVA-8, (C) PVA-20, and (D) PVA-32 mats.
